# Supplementary material for: End-to-End Protocol for the Detection of SARS-CoV-2 from Built Environments
Source: PubMed Central journal article supplement (PMC7542562; doi:10.1128/msystems.00771-20), 2020-10-06

**Viral Copy Recovery (%)**

120  
100  
80  
60

Water  
No Swab

Metal SS

Amerstat

Plastic

Metal Cu

Painted  
Surface

Wood

**Material**

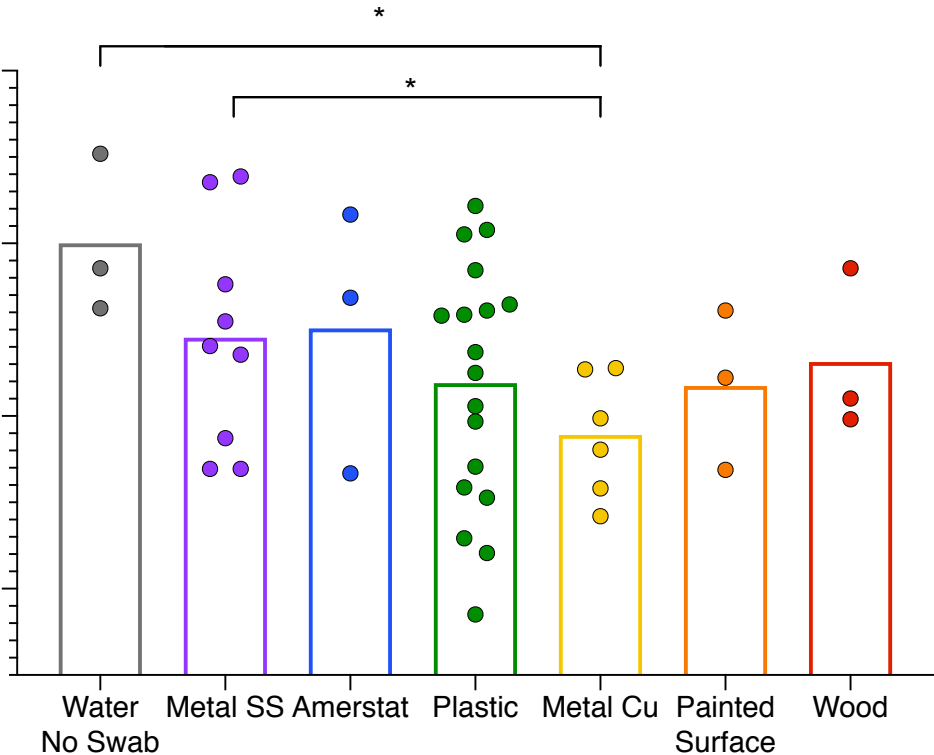

Supplement: mSystems.00771-20-sf002.pdf [file mSystems.00771-20-sf002.pdf]
