# Supplementary material for: End-to-End Protocol for the Detection of SARS-CoV-2 from Built Environments
Source: PubMed Central journal article supplement (PMC7542562; doi:10.1128/msystems.00771-20), 2020-10-06
Supplement: mSystems.00771-20-sf003.pdf [file mSystems.00771-20-sf003.pdf]

**A)**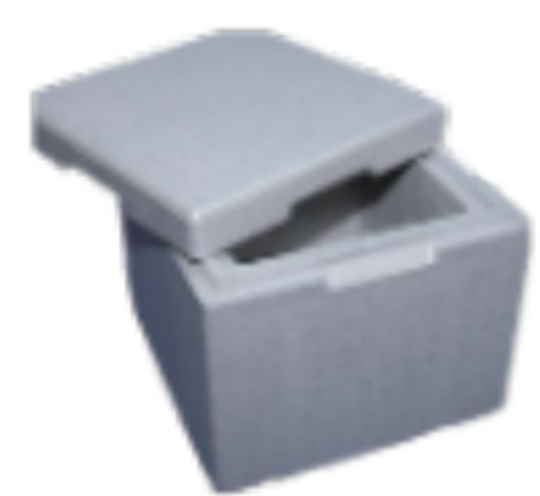

Stabilization  
buffer on ice

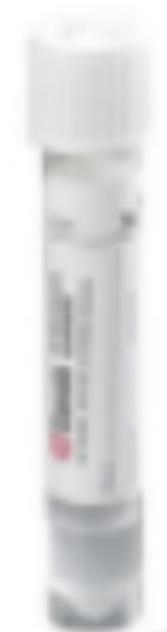

Copan

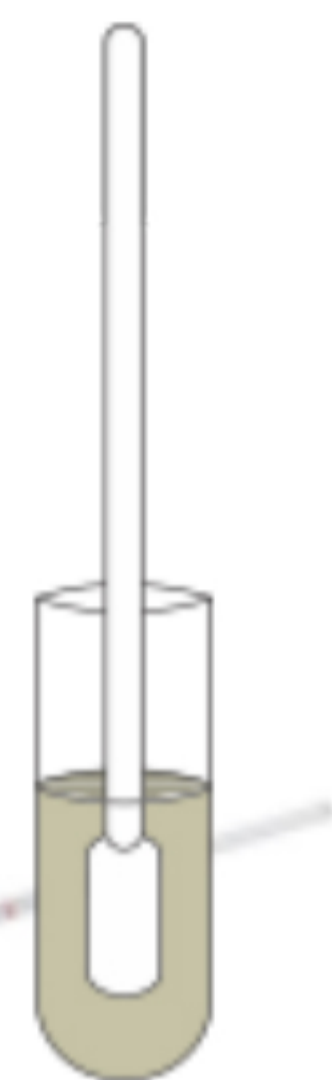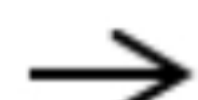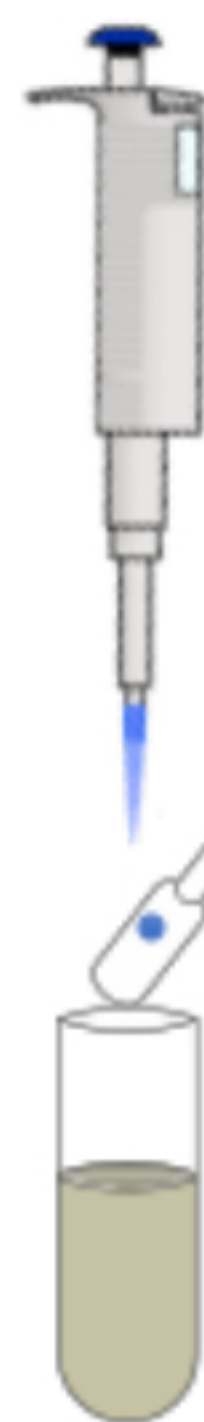

Lysis-  
buffer

→ Incubate

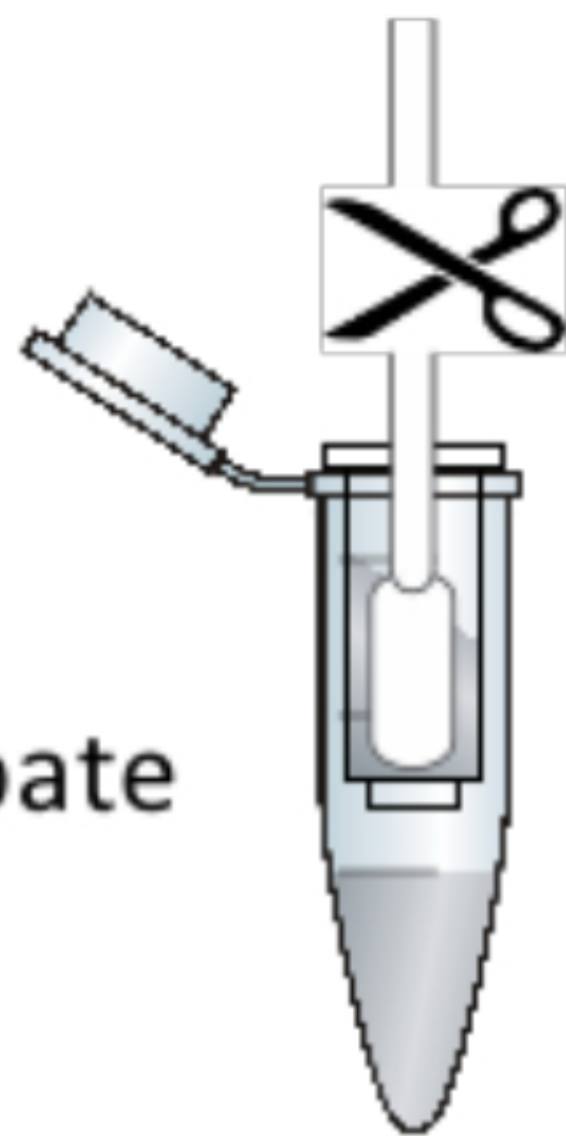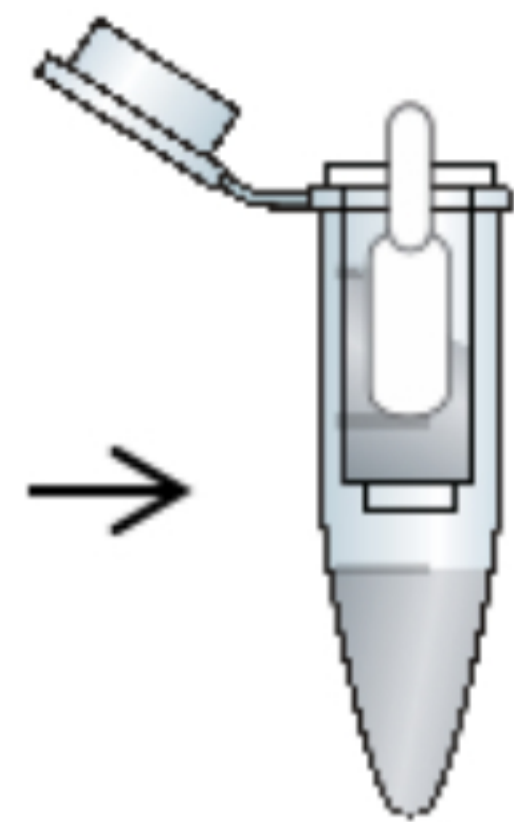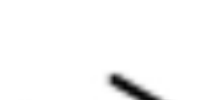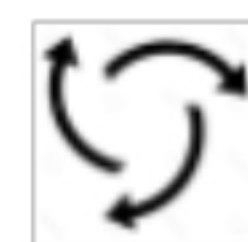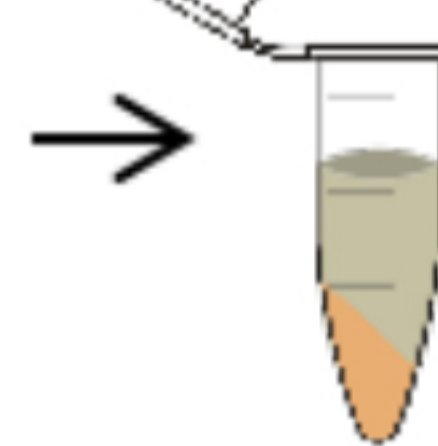

Media

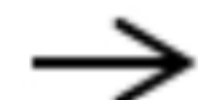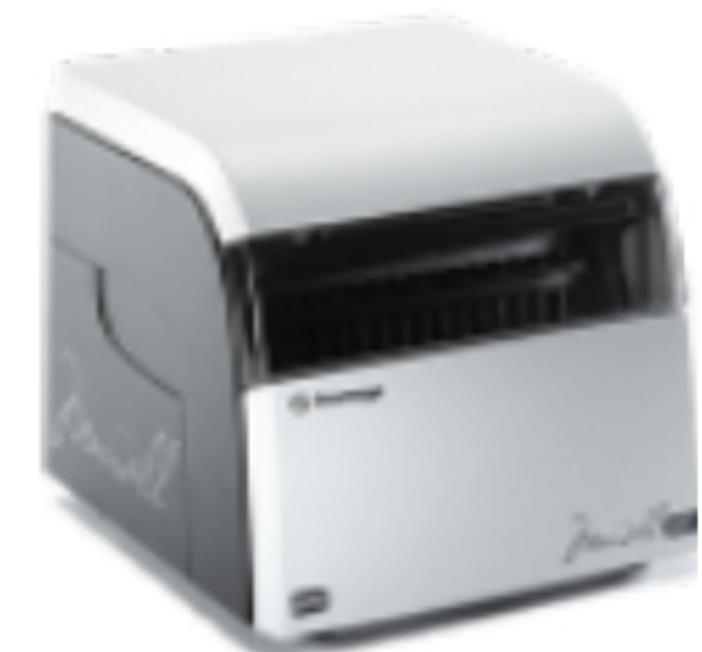

Promega  
Maxwell  
Extraction

>1.5h / 96 samples

**B)**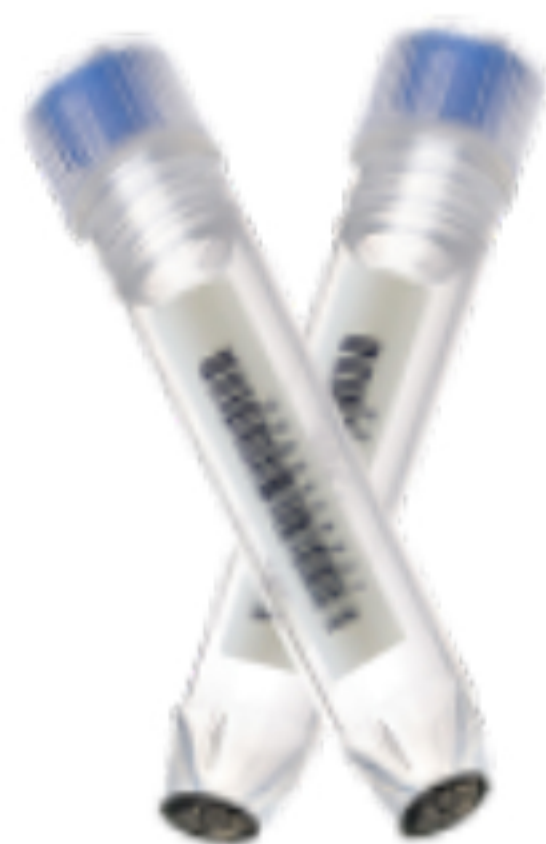

+ Zymo  
Shield at  
room temp.

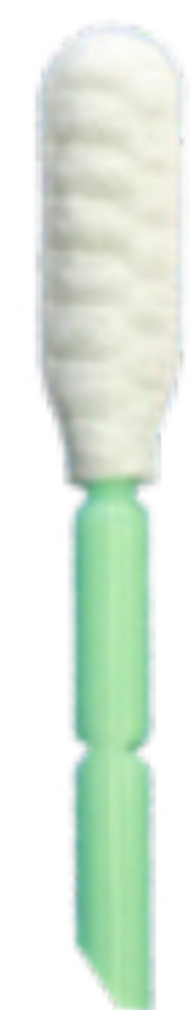

Isohelix

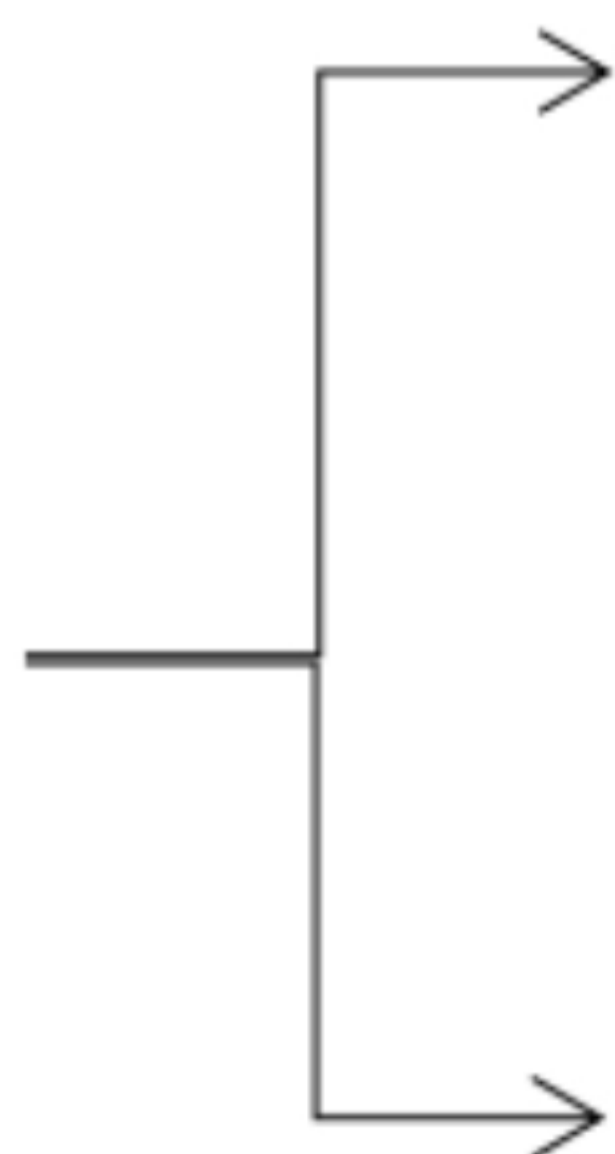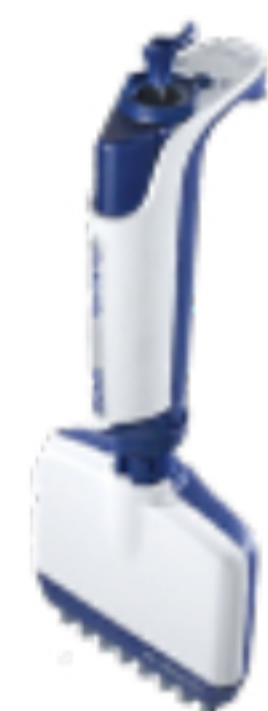

HT-Lysis  
96-well

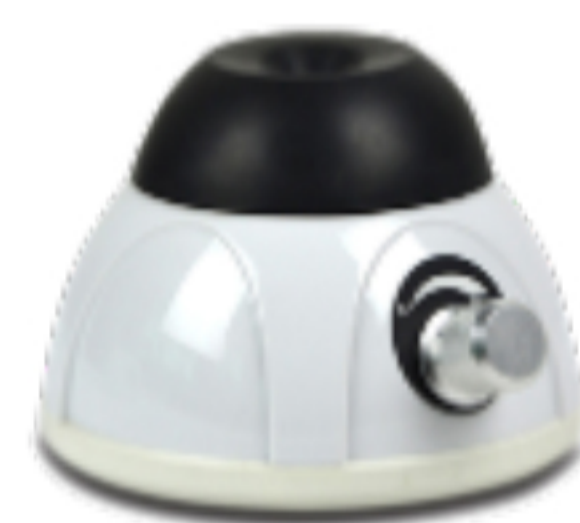

Vortex 1min

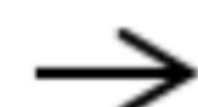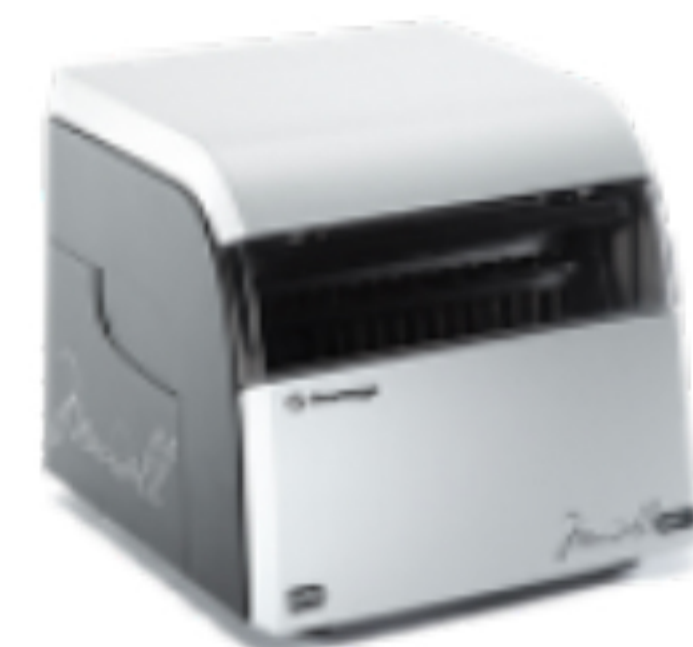

Promega  
Maxwell  
Extraction

Zymo Extraction at Zymo HQ
