# Supplementary material for: End-to-End Protocol for the Detection of SARS-CoV-2 from Built Environments
Source: PubMed Central journal article supplement (PMC7542562; doi:10.1128/msystems.00771-20), 2020-10-06

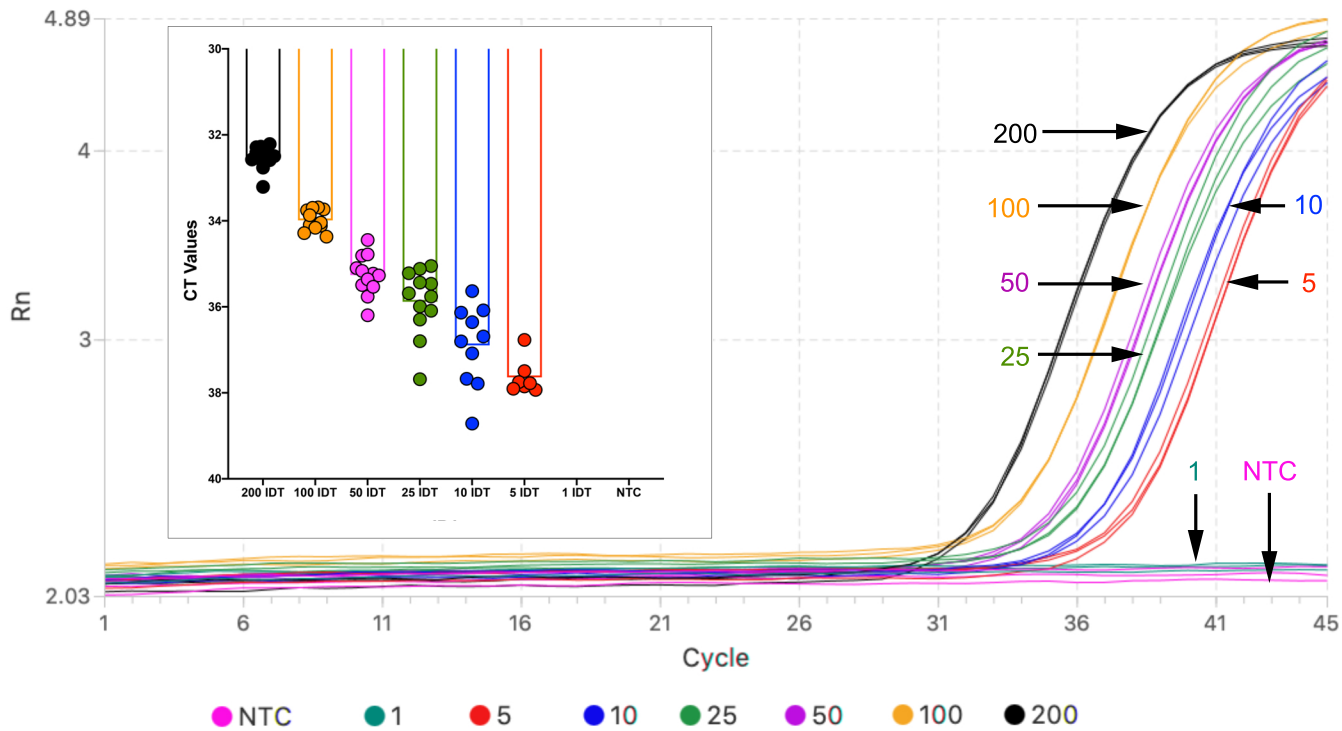

Supplement: mSystems.00771-20-sf005.pdf [file mSystems.00771-20-sf005.pdf]
