# Supplementary material for: End-to-End Protocol for the Detection of SARS-CoV-2 from Built Environments
Source: PubMed Central journal article supplement (PMC7542562; doi:10.1128/msystems.00771-20), 2020-10-06
Supplement: mSystems.00771-20-sf006.pdf [file mSystems.00771-20-sf006.pdf]

**A**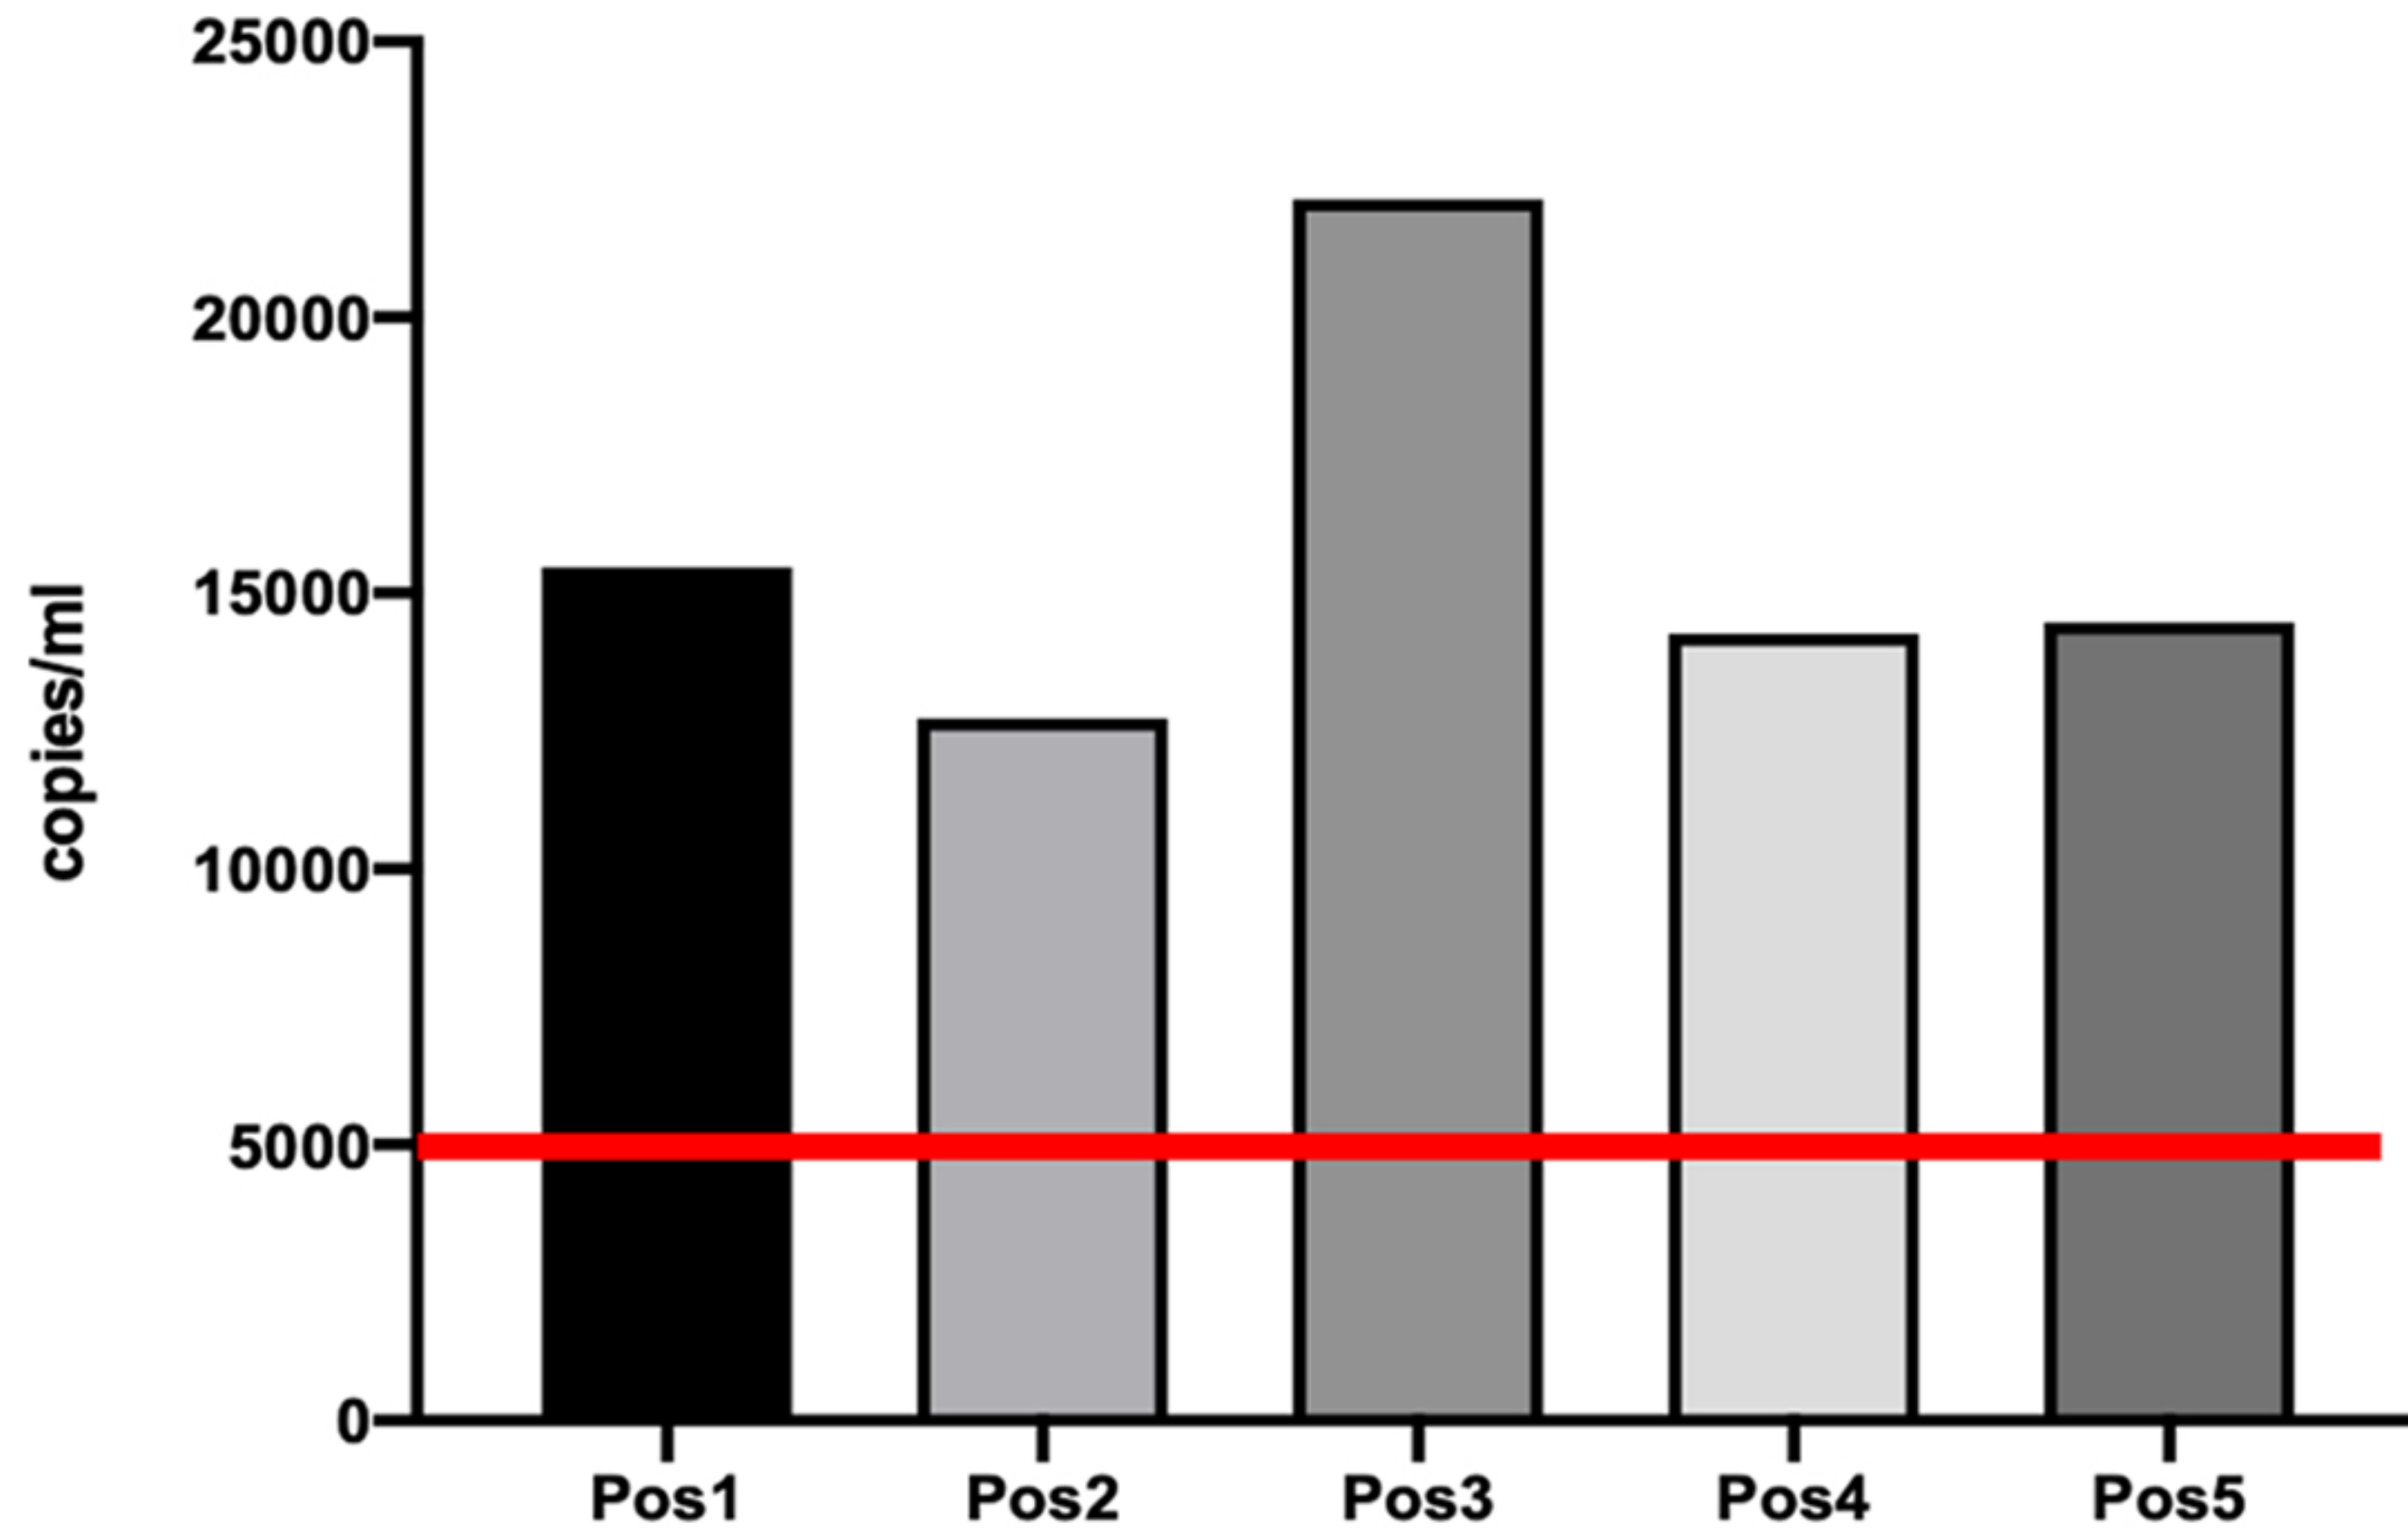**B**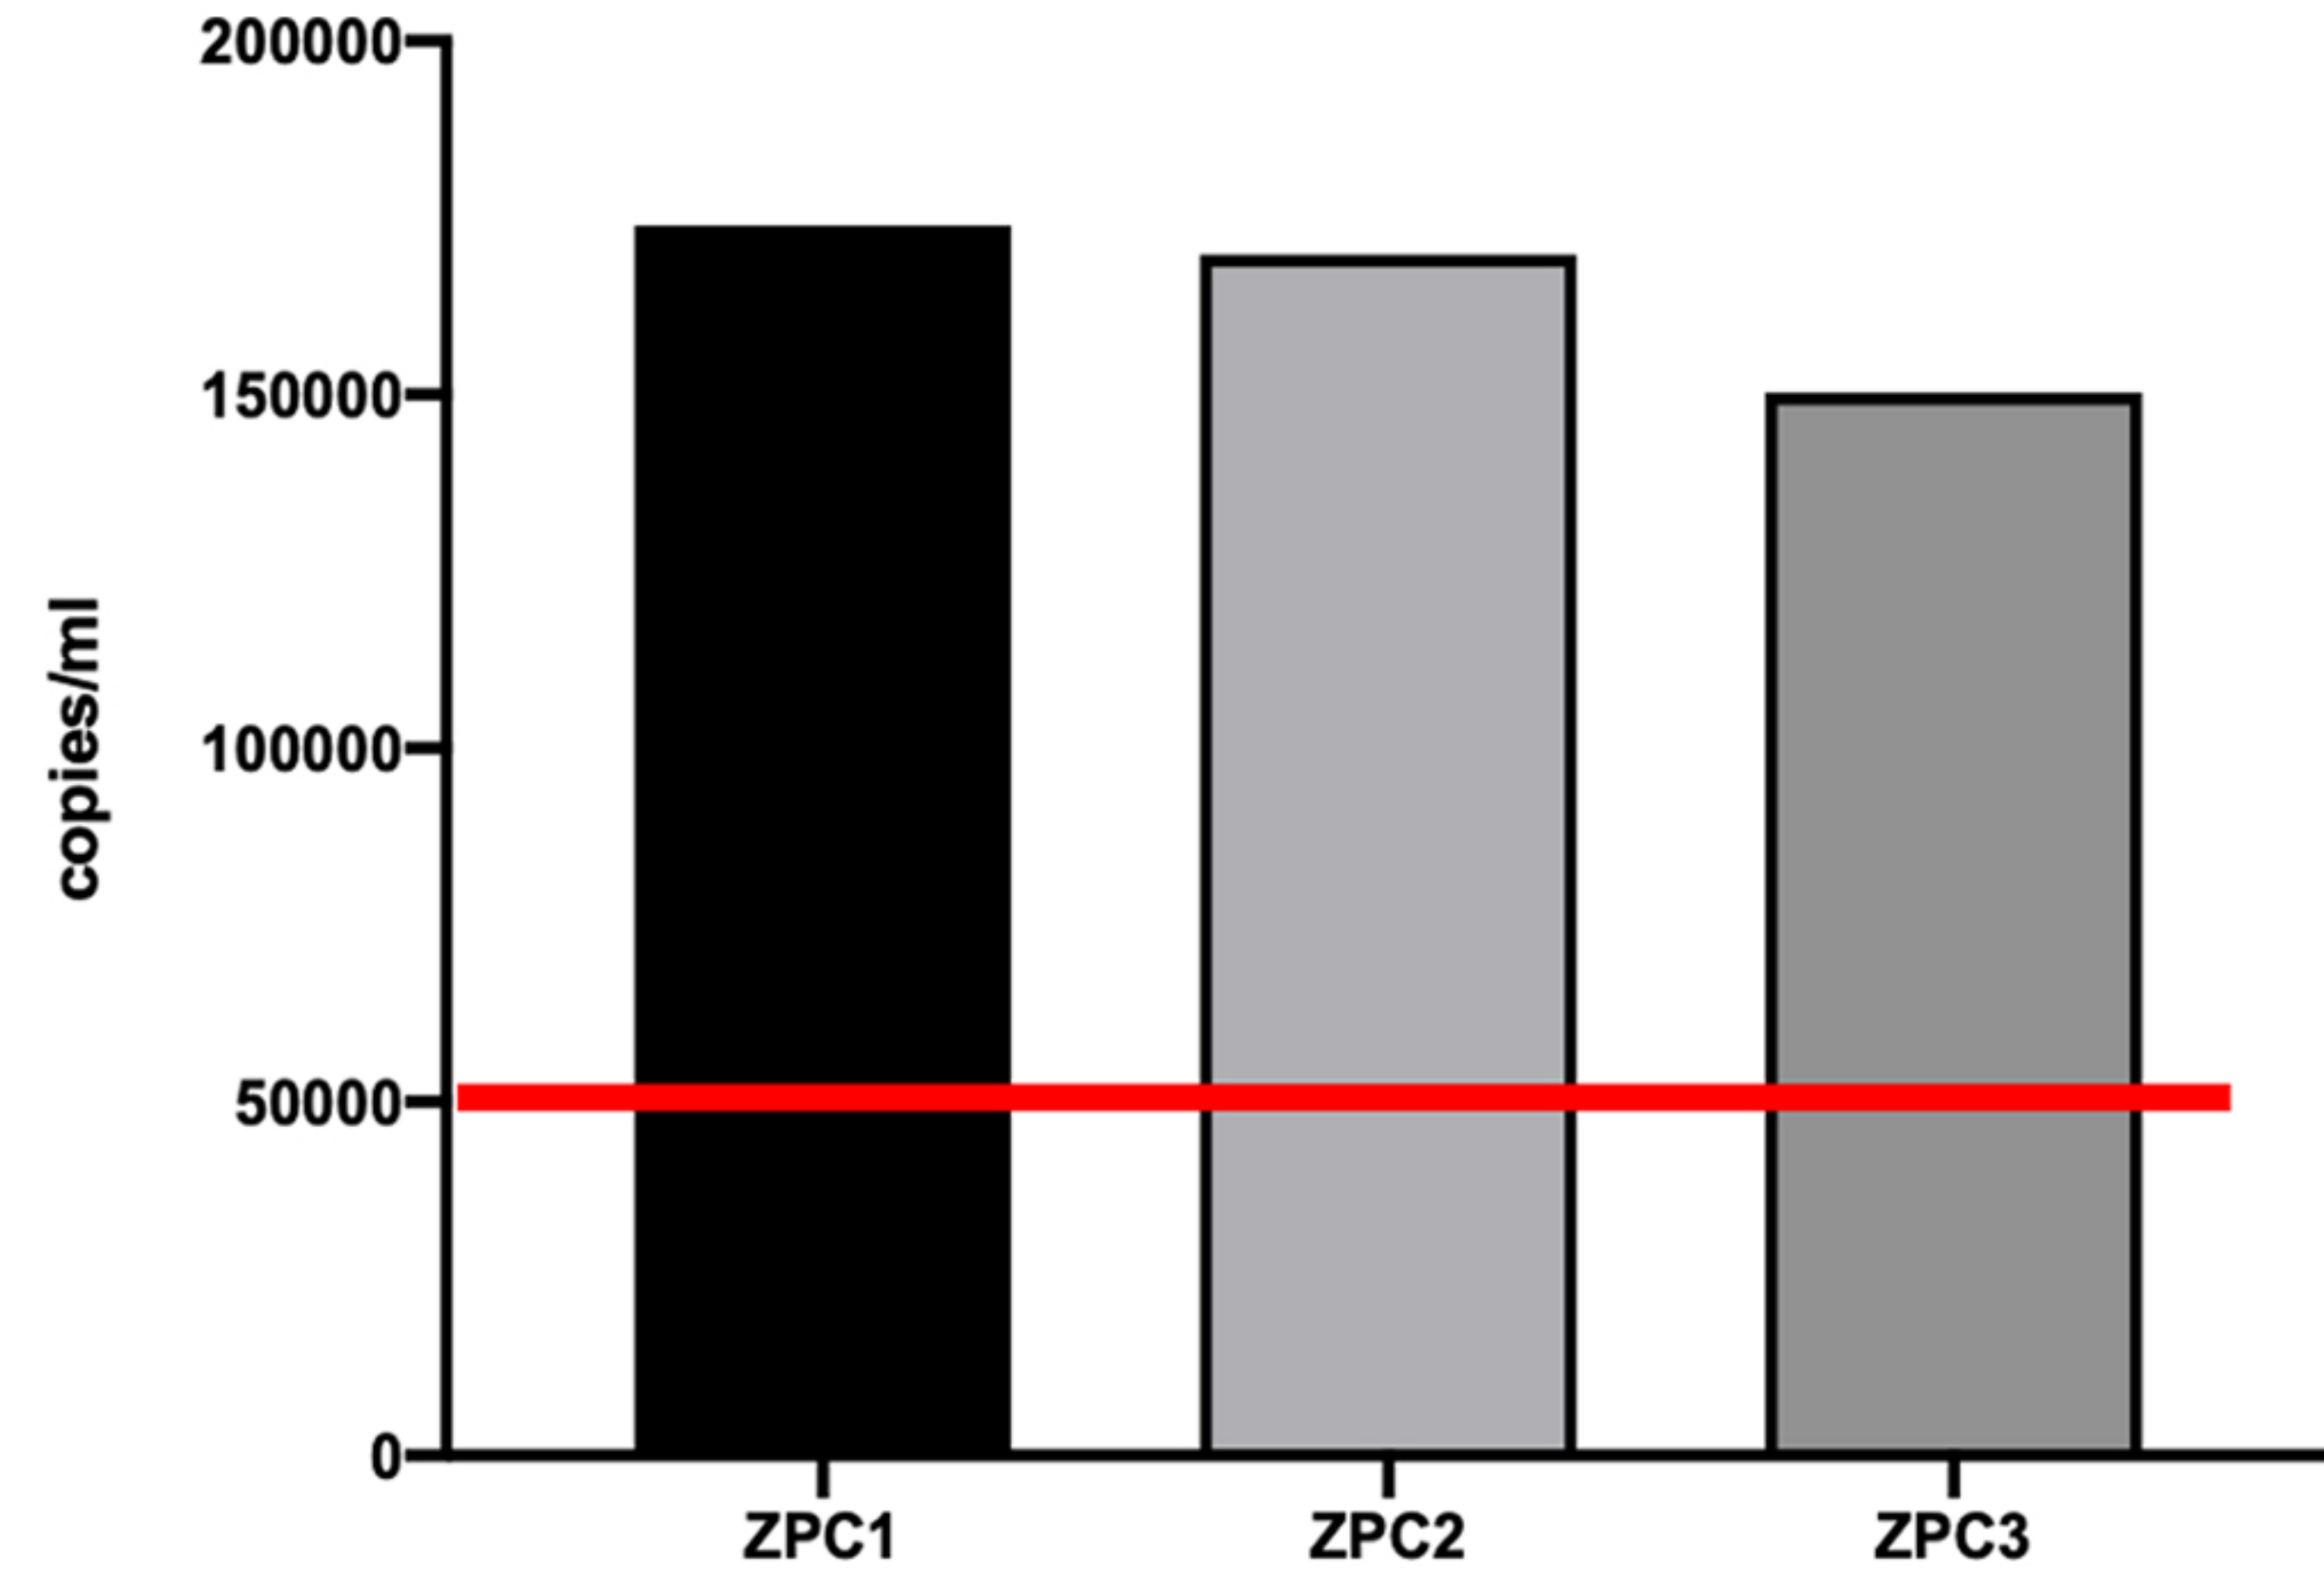**C**

N1 Nucleocapsid Fragment Copies per mL

|          | <u>Manufacturer Reported</u> | <u>ddPCR</u> | <u>RT-qPCR</u> | <u>Fold Difference</u> |
|----------|------------------------------|--------------|----------------|------------------------|
| AccuPlex | 5,000                        | 5,879        | 15,815         | 2.69                   |
| NATrol   | 50,000                       | 47,000       | 164,646        | 3.5                    |
