# Supplementary material for: End-to-End Protocol for the Detection of SARS-CoV-2 from Built Environments
Source: PubMed Central journal article supplement (PMC7542562; doi:10.1128/msystems.00771-20), 2020-10-06

| Date    | Well | Sample               | Target | Conc/ $\mu$ l | Copies Per 20 $\mu$ L Well | Poisson Conf Max | Poisson Conf Min | Sample  | Positives | Negatives | Accepted Droplets | Threshold | Copies/ $\mu$ l Sample | RunAve | Standard deviation |
|---------|------|----------------------|--------|---------------|----------------------------|------------------|------------------|---------|-----------|-----------|-------------------|-----------|------------------------|--------|--------------------|
| 7/15/20 | C03  | NTC                  | N2     | 0             | 0                          | 0.21             | 0                | NTC     | 0         | 17125     | 17125             | 2090      |                        |        |                    |
| 7/15/20 | E05  | APX-Direct-15:15-2uL | N2     | 0.44          | 8.8                        | 0.9              | 0.17             | APX-2uL | 6         | 16000     | 16006             | 2090      | 4.4                    |        |                    |
| 7/15/20 | E06  | APX-Direct-15:15-2uL | N2     | 0.42          | 8.4                        | 0.86             | 0.17             | APX-2uL | 6         | 16699     | 16705             | 2090      | 4.2                    | 5.00   | 1.22               |
| 7/15/20 | E07  | APX-Direct-15:15-2uL | N2     | 0.64          | 12.8                       | 1.12             | 0.32             | APX-2uL | 10        | 18434     | 18444             | 2090      | 6.4                    |        |                    |
| 7/15/20 | E08  | ZEP-Direct-15:15-2uL | N2     | 4.6           | 92                         | 5.6              | 3.7              | ZEP-2uL | 84        | 21502     | 21586             | 2554      | 46                     |        |                    |
| 7/15/20 | E09  | ZEP-Direct-15:15-2uL | N2     | 5.2           | 104                        | 6.4              | 4.2              | ZEP-2uL | 93        | 20858     | 20951             | 2554      | 52                     | 48.33  | 3.21               |
| 7/15/20 | E10  | ZEP-Direct-15:15-2uL | N2     | 4.7           | 94                         | 5.7              | 3.8              | ZEP-2uL | 88        | 22168     | 22256             | 2554      | 47                     |        |                    |

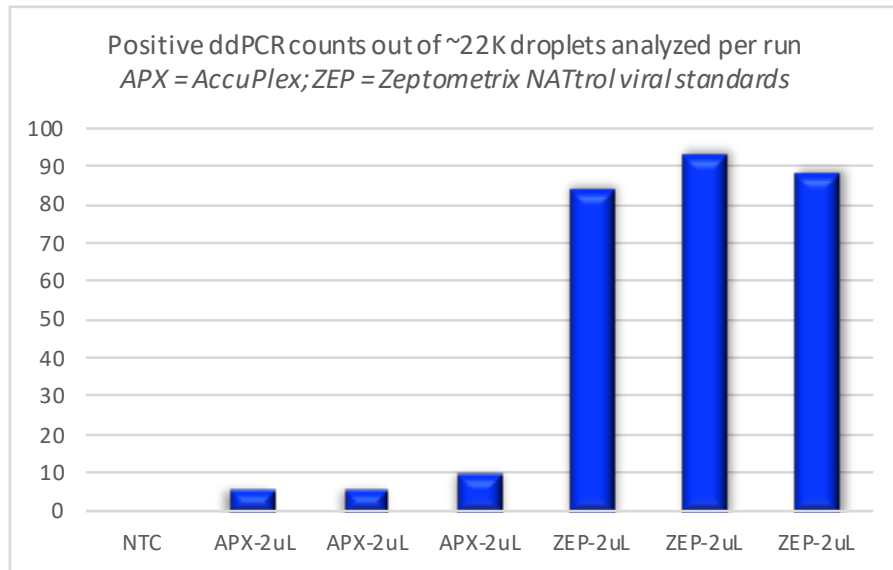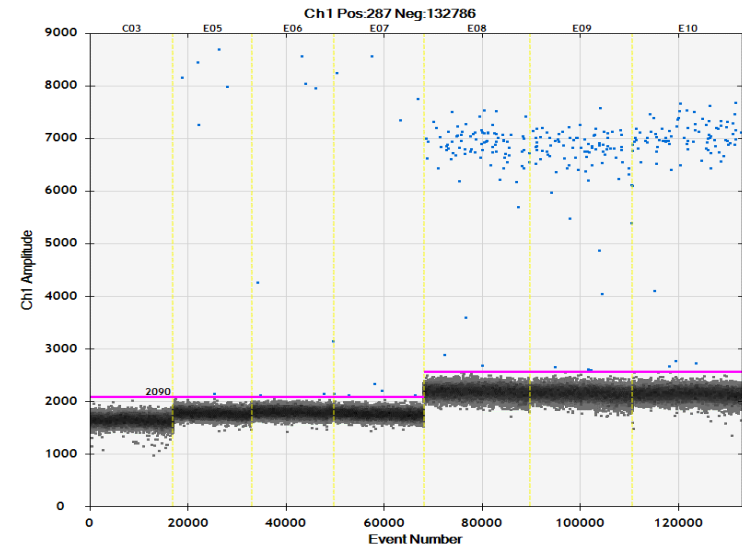

Supplement: mSystems.00771-20-st002.pdf [file mSystems.00771-20-st002.pdf]
